# Supplementary material
Source: HighWire-hosted journal article supplement (https://www.cmajopen.ca/highwire/filestream/87901/field_highwire_adjunct_files/0/2020-0251-1-at.pdf)
Supplement: 2020-0251-1-at.pdf [file 2020-0251-1-at.pdf]

**Appendix 1. Dragons’ Den Symposium Quality Improvement Surveys and the *Innovation-Decision Process* (Rogers, 2003)**

**SUMMARY OF ROGERS’ INNOVATION-DECISION PROCESS (1)**

The diffusion of innovation represents innovation spread within a group or system. At the individual level, diffusion of innovation occurs through the innovation-decision process, during which decision-making units (persons or organizations) decide to adopt an innovation (or not). The innovation-decision process is summarized in Figure 1 and the five stages in the process are summarized in Table 1.

**Figure 1. A model of five stages in the innovation-decision process (adapted from Rogers, 2003)**

**PRIOR CONDITIONS**

1. Previous practice
2. Felt needs/problems
3. Innovativeness
4. Norms of social systems

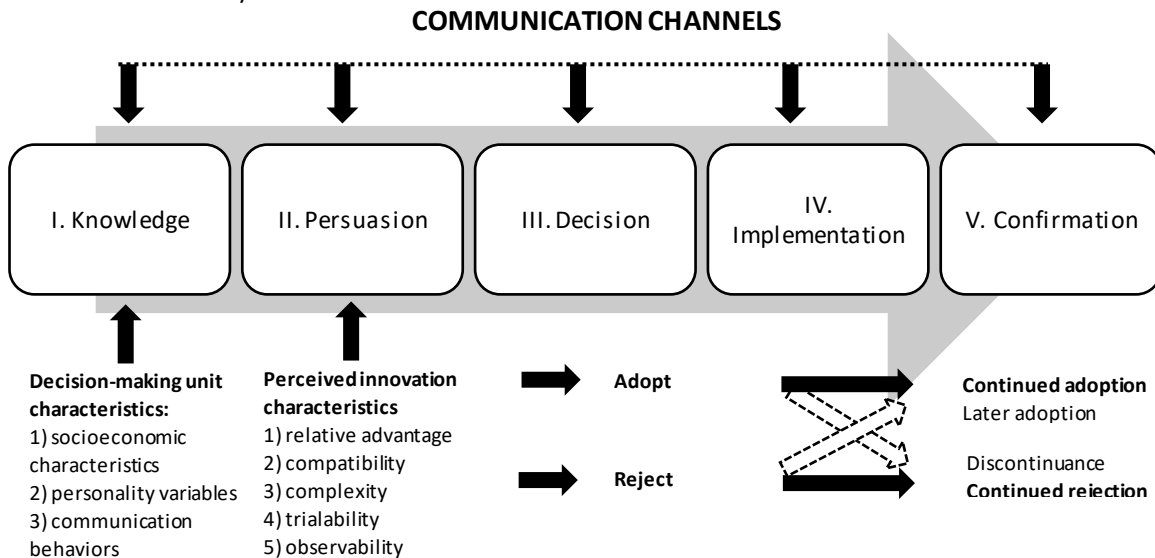

**Table 1. Summary of the five stages in the innovation-decision process (adapted from Rogers, 2003)**

| Five stages of the innovation-decision process |                                                                                                                                        |
|------------------------------------------------|----------------------------------------------------------------------------------------------------------------------------------------|
| I. Knowledge                                   | When a person or organization is exposed to an innovation, becomes aware of an innovation and gains some knowledge about how it works. |
| II. Persuasion                                 | By obtaining more information about an innovation and becoming psychologically involved, a person or organization forms an attitude    |

|                        |                                                                                                                                                                              |
|------------------------|------------------------------------------------------------------------------------------------------------------------------------------------------------------------------|
|                        | (favorable or unfavorable) towards an innovation.                                                                                                                            |
| III. Decision          | When a person or organization decides whether to adopt or reject an innovation.                                                                                              |
| IV. Implementation     | When a person or organization puts an innovation into practice, begins changing behaviors, or seeks information or support regarding how to implement the innovation.        |
| V. Confirmation        | When a person or organization reviews their previous decision and confirms or reverses their decision to adopt an innovation.                                                |
| Communication channels | The paths through which innovators or opinion leaders and potential adopters communicate about an innovation. The sources and channels affect rate and pattern of diffusion. |

**DRAGONS’ DEN SYMPOSIUM QUALITY IMPROVEMENT SURVEY QUESTIONS**  
(translated from French)

**Immediately post-symposium survey: Innovators**

| <b>Question</b>                                                                                                                                                                      | <b>Link with <i>Innovation-Decision Process</i> (Rogers, 2003)</b>                                                                                                                                                                                                                                                                                                                      |
|--------------------------------------------------------------------------------------------------------------------------------------------------------------------------------------|-----------------------------------------------------------------------------------------------------------------------------------------------------------------------------------------------------------------------------------------------------------------------------------------------------------------------------------------------------------------------------------------|
| 1. Do you intend to follow-up with clinical leads and dragon-facilitators interested in your innovation? <ul style="list-style-type: none"> <li>• Yes</li> <li>• No</li> </ul>       | Evaluates the effects of the symposium as a “communication channels”. Also, intention to follow-up is key to the innovation-decision process as further communication between innovators and potential adopters (clinical leads or Dragon-Facilitators) would contribute to the stages of I. Knowledge (communication behaviors), II. Persuasion, III. Decision and IV. Implementation. |
| If yes, how? <ul style="list-style-type: none"> <li>• Individually (email or phone)</li> <li>• Follow-up meeting</li> <li>• Create a committee</li> <li>• Other (specify)</li> </ul> | Describes expected communication channels.                                                                                                                                                                                                                                                                                                                                              |

Appendix 1, as supplied by authors. Appendix to: Smithman MA, Dumas Pilon M, Campbell M-J, et al. Evaluation of a *Dragons’ Den*–inspired symposium to spread primary health care innovations in Quebec, Canada: a mixed-methods study using quality-improvement e-surveys. *CMAJ Open* 2022. DOI:10.9778/cmajo.20200251. Copyright © 2022 The Author(s) or their employer(s). To receive this resource in an accessible format, please contact us at cmajgroup@cmaj.ca.

|                                                                                                                                                                                               |                                                                                                                                                                                    |
|-----------------------------------------------------------------------------------------------------------------------------------------------------------------------------------------------|------------------------------------------------------------------------------------------------------------------------------------------------------------------------------------|
| If not, why?                                                                                                                                                                                  | Helps understand why innovators do not intend to follow-up.                                                                                                                        |
| 2. In your opinion, what was the highlight of the symposium?                                                                                                                                  | Helps understand what components of the symposium were appreciated by innovators and identify what elements of the symposium support the innovation-decision process.              |
| 3. Would you recommend the symposium to a colleague?                                                                                                                                          | Evaluates the appreciation of the symposium as a communication channel.                                                                                                            |
| 4. What weaknesses would you suggest we improve?                                                                                                                                              | Helps identify weaknesses in the symposium as a communication channel.                                                                                                             |
| 5. Would you like to be invited to a 2 <sup>nd</sup> edition                                                                                                                                  | Evaluates the appreciation of the symposium as a communication channel.                                                                                                            |
| 6. How would you suggest we improve a next edition to better meet your needs?                                                                                                                 | Identify suggestions to improve the symposium as a communication channel, aligned with prior conditions (felt needs/problems), to further support the innovation-decision process. |
| 7. The College's objective was to catalyze innovation spread. Share your suggestions to better support your innovation's reach following the symposium?                                       | Helps identify further strategies that could help support the innovation-decision process after the symposium                                                                      |
| Other questions (results not reported here)                                                                                                                                                   |                                                                                                                                                                                    |
| 8. Innovation fair (8:50 to 12:00): The 6-minute rapid-fire presentations were useful (completely disagree, somewhat disagree, somewhat agree, completely agree)                              | Not applicable (Quality improvement)                                                                                                                                               |
| 9. Innovation fair (8:50 to 12:00): The format (rapid-fire presentations and blitz networking) met my expectations (completely disagree, somewhat disagree, somewhat agree, completely agree) | Not applicable (Quality improvement)                                                                                                                                               |
| 10. Innovation fair (8:50 to 12:00): Comments                                                                                                                                                 | Not applicable (Quality improvement)                                                                                                                                               |
| 11. Innovation café (13:15-14:15): The networking during the café met my expectations (completely disagree, somewhat disagree, somewhat agree, completely agree)                              | Not applicable (Quality improvement)                                                                                                                                               |
| 12. Innovation café (13:15-14:15) Comments                                                                                                                                                    | Not applicable (Quality improvement)                                                                                                                                               |
| 13. Innovators' workshop (14:15-16:30): The content of the workshop was relevant and useful (completely                                                                                       | Not applicable (Quality improvement)                                                                                                                                               |

Appendix 1, as supplied by authors. Appendix to: Smithman MA, Dumas Pilon M, Campbell M-J, et al. Evaluation of a *Dragons' Den*-inspired symposium to spread primary health care innovations in Quebec, Canada: a mixed-methods study using quality-improvement e-surveys. *CMAJ Open* 2022. DOI:10.9778/cmajo.20200251. Copyright © 2022 The Author(s) or their employer(s). To receive this resource in an accessible format, please contact us at [cmajgroup@cmaj.ca](mailto:cmajgroup@cmaj.ca).

|                                                                                                                                                                      |                                         |
|----------------------------------------------------------------------------------------------------------------------------------------------------------------------|-----------------------------------------|
| disagree, somewhat disagree, somewhat agree, completely agree)                                                                                                       |                                         |
| 14. Innovators' workshop (14:15-16:30): The workshop format helped achieve its objectives (completely disagree, somewhat disagree, somewhat agree, completely agree) | Not applicable<br>(Quality improvement) |
| 15. Innovators' workshop (14:15-16:30): Comments                                                                                                                     | Not applicable<br>(Quality improvement) |
| 16. Does the vision of the Patient's Medical Home inspire you? (0=not at all, 10=completely)                                                                         | Not applicable<br>(Quality improvement) |
| 17. Is the vision for the Patient's Medical Home useful to improve primary healthcare service delivery? (0=not at all, 10=completely)                                | Not applicable<br>(Quality improvement) |
| 18. Did the symposium's planning, content, and programme respect ethical norms? (Yes/No)                                                                             | Not applicable<br>(Quality improvement) |
| If not, why?                                                                                                                                                         |                                         |
| 19. Were you under the impression that there was a commercial bias during the event? (Yes/No)                                                                        | Not applicable<br>(Quality improvement) |
| If yes, please describe:                                                                                                                                             |                                         |

#### Immediately post-symposium survey: clinical leads and dragon-facilitators

| Question                                                                                                                                                           | Link with <i>Innovation-Decision Process</i> (Rogers, 2003)                                                                                                           |
|--------------------------------------------------------------------------------------------------------------------------------------------------------------------|-----------------------------------------------------------------------------------------------------------------------------------------------------------------------|
| 1. The format of the symposium allowed me to discover new innovations (Totally disagree, somewhat disagree, somewhat agree, totally agree)                         | Evaluates the effects of the symposium on knowledge of innovations (stage I. knowledge)                                                                               |
| Comments                                                                                                                                                           | Helps understand the effects on discovering new innovations (stages I. knowledge and II. Persuasion)                                                                  |
| 2. What is the likelihood that you will adopt, replicate or support an innovation presented at the symposium in the next year? (0=not at all, 10=extremely likely) | Evaluates the effects of the symposium on intention to adopt or support an innovation in the next year (stages II. Persuasion and III. Decision)                      |
| 3. In your opinion, what was the highlight of the symposium?                                                                                                       | Helps understand what components of the symposium were appreciated by innovators and identify what elements of the symposium support the innovation-decision process. |
| 4. Would you recommend the symposium to a colleague?                                                                                                               | Evaluates the appreciation of the symposium as a communication channel.                                                                                               |

Appendix 1, as supplied by authors. Appendix to: Smithman MA, Dumas Pilon M, Campbell M-J, et al. Evaluation of a *Dragons' Den*-inspired symposium to spread primary health care innovations in Quebec, Canada: a mixed-methods study using quality-improvement e-surveys. *CMAJ Open* 2022. DOI:10.9778/cmajo.20200251. Copyright © 2022 The Author(s) or their employer(s). To receive this resource in an accessible format, please contact us at [cmajgroup@cmaj.ca](mailto:cmajgroup@cmaj.ca).

|                                                                                                                                                                                                                       |                                                                                                                                                                                    |
|-----------------------------------------------------------------------------------------------------------------------------------------------------------------------------------------------------------------------|------------------------------------------------------------------------------------------------------------------------------------------------------------------------------------|
| 5. What weaknesses would you suggest we improve?                                                                                                                                                                      | Helps identify weaknesses in the symposium as a communication channel.                                                                                                             |
| 6. Would you like to be invited to a 2 <sup>nd</sup> edition                                                                                                                                                          | Evaluates the appreciation of the symposium as a communication channel.                                                                                                            |
| 7. How would you suggest we improve a next edition to better meet your needs?                                                                                                                                         | Identify suggestions to improve the symposium as a communication channel, aligned with prior conditions (felt needs/problems), to further support the innovation-decision process. |
| <b>Other questions (results not reported here)</b>                                                                                                                                                                    |                                                                                                                                                                                    |
| 8. Innovation fair (8:50 to 12:00): The 6-minute rapid-fire presentations were relevant, original and useful (completely disagree, somewhat disagree, somewhat agree, completely agree)                               | Not applicable (Quality improvement)                                                                                                                                               |
| 9. Innovation fair (8:50 to 12:00): The blitz networking following the rapid-fire presentations helped me learn more about the innovations (completely disagree, somewhat disagree, somewhat agree, completely agree) | Not applicable (Quality improvement)                                                                                                                                               |
| 10. Innovation fair (8:50 to 12:00): Comments                                                                                                                                                                         | Not applicable (Quality improvement)                                                                                                                                               |
| 11. Innovation café (13:15-14:15): The innovations were relevant, original and useful (completely disagree, somewhat disagree, somewhat agree, completely agree)                                                      | Not applicable (Quality improvement)                                                                                                                                               |
| 12. Innovation café (13:15-14:15): The activity met my expectations (completely disagree, somewhat disagree, somewhat agree, completely agree)                                                                        | Not applicable (Quality improvement)                                                                                                                                               |
| 13. Innovation café (13:15-14:15) Comments                                                                                                                                                                            | Not applicable (Quality improvement)                                                                                                                                               |
| 14. Does the vision of the Patient's Medical Home inspire you? (0=not at all, 10=completely)                                                                                                                          | Not applicable (Quality improvement)                                                                                                                                               |
| 15. Is the vision for the Patient's Medical Home useful to improve primary healthcare service delivery? (0=not at all, 10=completely)                                                                                 | Not applicable (Quality improvement)                                                                                                                                               |
| 16. Did the symposium's planning, content, and programme respect ethical norms? (Yes/No)                                                                                                                              | Not applicable (Quality improvement)                                                                                                                                               |
| If not, why?                                                                                                                                                                                                          |                                                                                                                                                                                    |
| 17. Were you under the impression that there was a commercial bias during the event? (Yes/No)                                                                                                                         | Not applicable (Quality improvement)                                                                                                                                               |
| If yes, please describe:                                                                                                                                                                                              |                                                                                                                                                                                    |

Appendix 1, as supplied by authors. Appendix to: Smithman MA, Dumas Pilon M, Campbell M-J, et al. Evaluation of a *Dragons' Den*-inspired symposium to spread primary health care innovations in Quebec, Canada: a mixed-methods study using quality-improvement e-surveys. *CMAJ Open* 2022. DOI:10.9778/cmajo.20200251. Copyright © 2022 The Author(s) or their employer(s). To receive this resource in an accessible format, please contact us at [cmajgroup@cmaj.ca](mailto:cmajgroup@cmaj.ca).

### Three-month post-symposium qualitative e-mail follow-up: innovators

| Question                                                               | Link with <i>Innovation-Decision Process</i> (Rogers, 2003)                                                                                               |
|------------------------------------------------------------------------|-----------------------------------------------------------------------------------------------------------------------------------------------------------|
| 1. How have your post-symposium innovation follow-ups been going?      | Helps understand effects of the symposium on the stages of I. knowledge (communication behaviours), II. Persuasion, III. Decision and IV. Implementation. |
| 2. What have your successes been in spreading your innovation to date? | Helps understand the success in the stages of I. knowledge (communication behaviours), II. Persuasion, III. Decision and IV. Implementation.              |
| 3. What barriers have you faced in spreading your innovation?          | Help understand the barriers to the stages of I. knowledge (communication behaviours), II. Persuasion, III. Decision and IV. Implementation.              |

### Nine-month post-symposium survey: innovators

| Question                                                                                                                                                                                                            | Link with <i>Innovation-Decision Process</i> (Rogers, 2003)                                                                                                 |
|---------------------------------------------------------------------------------------------------------------------------------------------------------------------------------------------------------------------|-------------------------------------------------------------------------------------------------------------------------------------------------------------|
| 1. Has your innovation been adopted by new University Family Medicine Groups or individuals following the symposium? Please describe.                                                                               | Evaluates and helps understand the effects of the symposium on the stages of III. Decision and IV. Implementation.                                          |
| 2. Did your experience at the symposium spark new ideas, opportunities or projects in your practice?<br>If yes, please describe.<br>If not, why?                                                                    | Describes effect on communication channels and on sparking ideas of needs or new innovations, which in turn may be spread (prior conditions, I. knowledge). |
| 3. Following the symposium, how could the College further support the diffusion of your innovation?                                                                                                                 |                                                                                                                                                             |
| <b>Other questions (results not reported here)</b>                                                                                                                                                                  |                                                                                                                                                             |
| 4. With regards to the Patient's Medical Home, would you say its vision or its concepts were useful and relevant to improve primary healthcare delivery within your work? (0=not at all; 10= completely)<br>Specify | Not applicable<br>(Quality improvement)                                                                                                                     |

Appendix 1, as supplied by authors. Appendix to: Smithman MA, Dumas Pilon M, Campbell M-J, et al. Evaluation of a *Dragons' Den*-inspired symposium to spread primary health care innovations in Quebec, Canada: a mixed-methods study using quality-improvement e-surveys. *CMAJ Open* 2022. DOI:10.9778/cmajo.20200251. Copyright © 2022 The Author(s) or their employer(s). To receive this resource in an accessible format, please contact us at cmajgroup@cmaj.ca.

### Nine-month post-symposium survey: clinical leads

| Question                                                                                                                                                                                                 | Link with <i>Innovation-Decision Process</i> (Rogers, 2003)                                                                                                 |
|----------------------------------------------------------------------------------------------------------------------------------------------------------------------------------------------------------|-------------------------------------------------------------------------------------------------------------------------------------------------------------|
| 1. Have you adopted one or more innovations from the symposium?                                                                                                                                          | Evaluates the effects of the symposium on the stages of III. Decision and IV. Implementation.                                                               |
| If yes, to what degree did it improve your primary healthcare team's experience (0=not at all, 10=extremely)                                                                                             | Evaluates the perceived impact of adopted innovations, which in closely related to the IV. Implementation and V. confirmation stages.                       |
| If yes, to what extent did it improve your patients' experience (0=not at all, 10=extremely)                                                                                                             | Evaluates the perceived impact of adopted innovations, which in closely related to the IV. Implementation and V. confirmation stages.                       |
| If not, why not? (in a few words)                                                                                                                                                                        | Helps understand why clinical leads did not adopt innovations following the symposium.                                                                      |
| 2. Did your experience at the symposium spark new ideas, opportunities or projects in your practice? Please describe.                                                                                    | Describes effect on communication channels and on sparking ideas of needs or new innovations, which in turn may be spread (prior conditions, I. knowledge). |
| If yes, please describe.                                                                                                                                                                                 |                                                                                                                                                             |
| If not, why?                                                                                                                                                                                             |                                                                                                                                                             |
| 3. Following the symposium, how could the College further support the diffusion of your innovation?                                                                                                      | Provides insight on how to further support the innovation-decision process.                                                                                 |
| <b>Other questions (results not reported here)</b>                                                                                                                                                       |                                                                                                                                                             |
| 4. With regards to the Patient's Medical Home, would you say its vision or its concepts were useful and relevant to improve primary healthcare delivery within your work? (0=not at all; 10= completely) | Not applicable (Quality improvement)                                                                                                                        |
| Specify                                                                                                                                                                                                  |                                                                                                                                                             |

1. Rogers E. Diffusion of innovations. New York: Free Press; 2003.
